# Supplementary material for: Antimicrobial susceptibility and multilocus sequence typing of Mycoplasma capricolum subsp. capricolum
Source: PLOS journal article supplement (doi:10.1371/journal.pone.0174700), 2017-03-27

**S2 Fig.**

Evolutionary tree based on *fusA* sequences. The tree was constructed using the neighbor-joining algorithm. Bootstrap percentage values were calculated from 1000 replications and values over 50% are displayed.

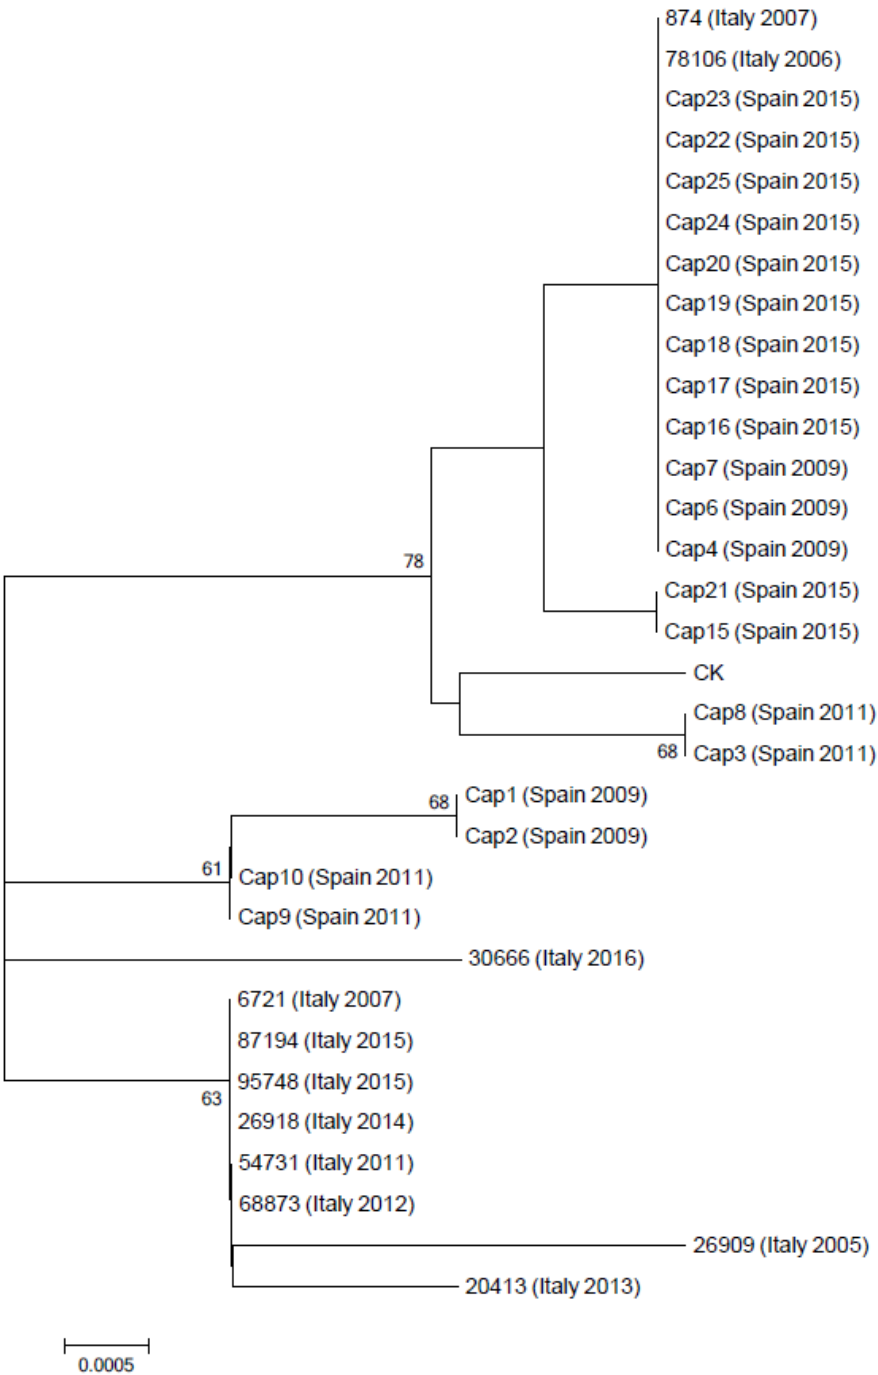

Supplement: S2 (10.1371/journal.pone.0174700.s002) [file journal.pone.0174700.s002]
